# Supplementary material for: A New Topology of the Human Y Chromosome Haplogroup E1b1 (E-P2) Revealed through the Use of Newly Characterized Binary Polymorphisms
Source: PLoS One. 2011 Jan 6;6(1):e16073. doi: 10.1371/journal.pone.0016073 (PMC3017091; doi:10.1371/journal.pone.0016073)
Supplement: Table S1 — Summary information for 13 Y chromosomes analyzed by sequencing. (XLS) [file pone.0016073.s001.xls]

## Sheet: Foglio1
Table S1: Summary information for 13 Y chromosomes analyzed by sequencing
	Haplogroup (former)		New haplogroup		Length of the sequenced tract (bp)
	by lineage	by mutation	by lineage	by mutation
1	E1b1a*	E-M2*	E1b1a1*	E-M2*	33275
2	E1b1a*	E-M2*	E1b1a1*	E-M2*	70603
3	E1b1a*	E-M2*	E1b1a1*	E-M2*	21126
4	E1b1a8a*	E-U209*	E1b1a1g1d	E-V39	88474
5	E1b1b*	E-M215*	E1b1b2	E-V16	18949
6	E1b1b1*	E-M35*	E1b1b1b*	E-V257*	8045
7	E1b1b1*	E-M35*	E1b1b1e*	E-M293*	20282
8	E1b1b1*	E-M35*	E1b1b1f	E-V42	46280
9	E1b1b1*	E-M35*	E1b1b1g	E-V92	76879
10	E1b1b1a	E-M78	E1b1b1a1	E-M78	113281
11	E1b1b1c1*	E-M34*	E1b1b1c1*	E-M34*	64456
12	E1b1b1c1*	E-M34*	E1b1b1c1*	E-M34*	8476
13	E1b1b1c1*	E-M34*	E1b1b1c1c	E-V23	20511
